# Supplementary material
Source: PubMed Central journal article supplement (PMC7658834)
Supplement: 20-00640.pdf [file 20-00640.pdf]

**On-line Table 1: CMs and associated anomalies**

| Type of CM | Brain                                                                                                                                                                                                                                                                                                                                                                                                                                                                                              | Spine and Spinal Cord                                                                                                                                                                                                                                                                                                                       | Meninges                                                                 |
|------------|----------------------------------------------------------------------------------------------------------------------------------------------------------------------------------------------------------------------------------------------------------------------------------------------------------------------------------------------------------------------------------------------------------------------------------------------------------------------------------------------------|---------------------------------------------------------------------------------------------------------------------------------------------------------------------------------------------------------------------------------------------------------------------------------------------------------------------------------------------|--------------------------------------------------------------------------|
| 1          | Cerebellar tonsillar herniation; obex herniation – CM 1.5; effacement of prepontine and retrotonsillar cisterns; rarely hydrocephalus                                                                                                                                                                                                                                                                                                                                                              | Syringohydromyelia; craniovertebral junction anomalies; platybasia; retroflexed odontoid process; atlanto-occipital assimilation; basilar invagination; scoliosis; vertebral segmentation and fusion anomalies                                                                                                                              | Arachnoid adhesions; sloped tentorium cerebelli; vertical straight sinus |
| 2          | Cerebellar tonsillar herniation; cerebellum wrapping around the brain stem; medullary kink; collicular fusion and tectal beaking; enlarged massa intermedia; corpus callosal agenesis with or without callosal lipoma; colpocephaly and hydrocephalus; absence of septum pellucidum; cranial nerve hypoplasia or aplasia; disorders of cortical formation; polymicrogyria; subependymal nodular heterotopia; abnormalities of the skull; luckenschadel; scalloped clivus and petrous temporal bone | Open spinal dysraphism; lumbar myelomeningocele; tethered cord; lipomyelomeningocele; diastematomyelia; craniovertebral junction anomalies; platybasia; retroflexed odontoid process; atlanto-occipital assimilation; basilar invagination; scoliosis; vertebral segmentation and fusion anomalies; omohyoid vertebra–Klippel Feil syndrome | Hypoplastic and/or fenestrated falx; interdigitating gyri                |
| 3          | Low occipital and/or high cervical encephalocele; herniation of the straight sinus and/or torcula; rest of the findings are similar to CM-2                                                                                                                                                                                                                                                                                                                                                        | High cervical encephalocele; vertebral defects in the posterior arch of the cervical spine                                                                                                                                                                                                                                                  | Hypoplastic and/or fenestrated falx; interdigitating gyri                |

**On-line Table 2: MR imaging protocol for evaluation of the brain and spine in CMs**

|                                                                                  |
|----------------------------------------------------------------------------------|
| Morphologic evaluation of the brain                                              |
| T1 SE (Spin Echo) 3D T1                                                          |
| T2 TSE, axial plane                                                              |
| DWI, axial plane (optional)                                                      |
| SWI, axial plane (optional)                                                      |
| Morphologic evaluation of the spine and spinal cord                              |
| T1 and T2 TSE, sagittal images of the whole spine                                |
| T2 TSE, axial plane                                                              |
| T1 TSE, coronal plane: to assess vertebral segmentation and fusion anomalies     |
| Advanced imaging sequences                                                       |
| Phase-contrast CSF flow studies, to assess CSF flow dynamics                     |
| Electrocardiogram and/or pulse-gated study                                       |
| Midsagittal and axial plane through the foramen magnum                           |
| Velocity-encoding gradient, from 5 to 15 cm/s                                    |
| DTI (optional), to assess microstructural alterations in the brain stem          |
| Axial or sagittal plane                                                          |
| 30 directions                                                                    |
| Cine MR imaging (optional), to assess cerebellar tonsillar and brain stem motion |
| True FISP technique                                                              |
| Electrocardiogram and/or pulse-gated study                                       |
| Sagittal plane                                                                   |

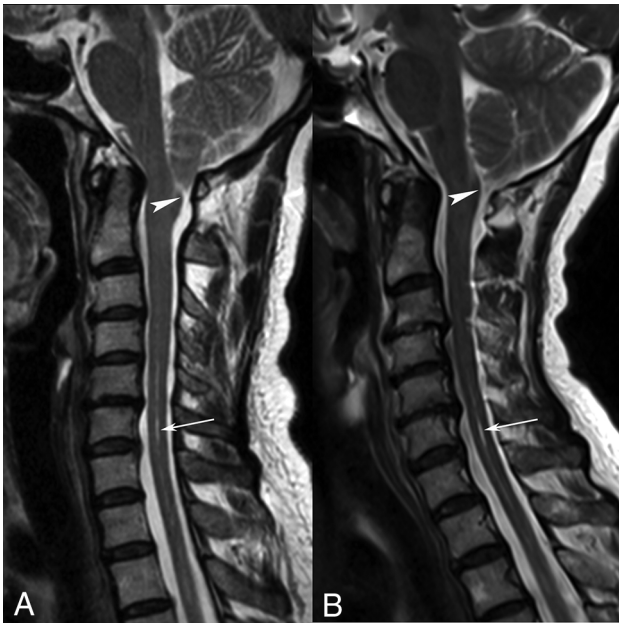

**ON-LINE FIG 1.** Spontaneous resolution of CM-1. Sagittal T2WI of the cervical spine. *A*, The initial MR image shows cerebellar tonsillar herniation below the foramen magnum, with downward migration of the obex (*arrowhead*). *B*, Spontaneous resolution on follow-up imaging, along with prominent central canal in the initial and follow-up scans (*arrow*).

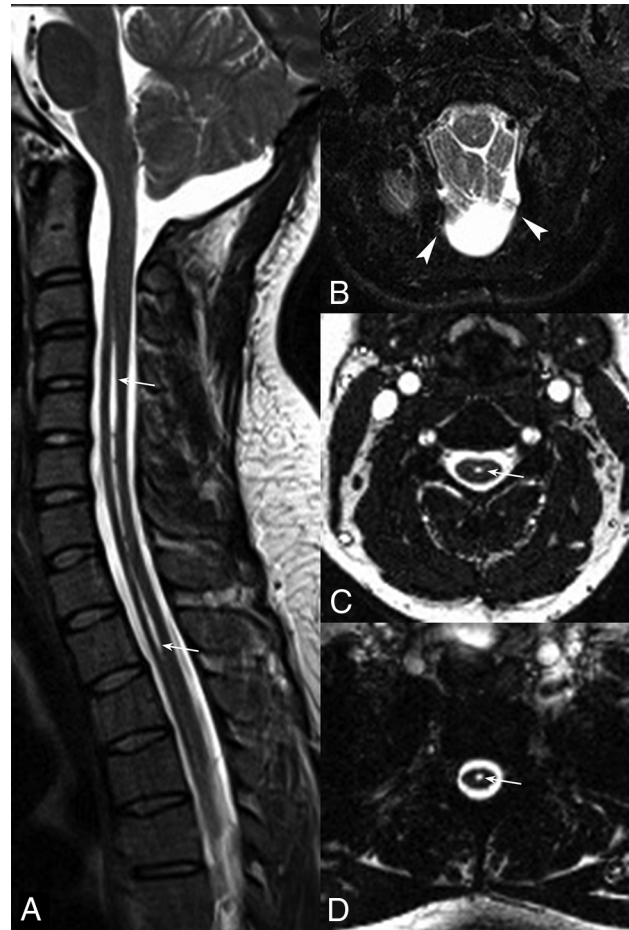

**ON-LINE FIG 2.** CM-1 (patient in Figs 1 and 5) after suboccipital craniectomy. *A*, Sagittal T2WI of the cervical and upper thoracic spine shows suboccipital craniectomy changes and CSF posterior to the cerebellum, with a reduction of the syringohydromyelia. Axial T2WIs of the brain (*B*) and spine (*C* and *D*) show adequate decompression of the posterior fossa after the suboccipital craniectomy (*arrowheads*) and interval reduction of the syringohydromyelia (*arrows*).
